# Supplementary material for: Ornithine and breast cancer: a matched case–control study
Source: PubMed Central journal article supplement (PMC7511971; doi:10.1038/s41598-020-72699-9), 2020-09-23
Supplement: 41598_2020_72699_MOESM1_ESM.pdf [file 41598_2020_72699_MOESM1_ESM.pdf]

# **Ornithine and Breast Cancer: A Matched Case- Control Study**

Jiayi Zhang<sup>a</sup>, Baihui Tao<sup>b</sup>, Yiran Chong<sup>b</sup>, Shuang Ma<sup>b</sup>, Gang Wu<sup>b</sup>, Hailong Zhu<sup>b</sup>, Yi Zhao<sup>b</sup>, Shitao Zhao<sup>b</sup>, Mengmeng Niu<sup>b</sup>, Shutian Zhang<sup>c</sup>, Tianyi Wang<sup>c</sup>, Shuman Yang<sup>d</sup>, Wenjing Qiao<sup>d</sup>, Ann M Vuong<sup>e</sup>, Jincheng Li<sup>b</sup>, Demiao Zhu<sup>b</sup>, Wei Tao<sup>b</sup>

<sup>a</sup>Department of Ultrasonography, The First Affiliated Hospital of Jinzhou Medical University, Jinzhou, Liaoning, China; <sup>b</sup>Department of Breast Surgery, The First Affiliated Hospital of Jinzhou Medical University, Jinzhou, Liaoning, China; <sup>c</sup>General Surgery/Liver and Pancreas Unit, The First Affiliated Hospital of Jinzhou Medical University, Jinzhou, Liaoning, China; <sup>d</sup>Department of Epidemiology and Biostatistics, School of Public Health, Jilin University, Changchun, Jilin, China; <sup>e</sup>Department of Epidemiology and Biostatistics, School of Public Health, University of Nevada, Las Vegas, US

**Supplementary Table S1. Baseline characteristics according to quartiles of ornithine in controls**

|                                      | Quartile 1 | Quartile 2   | Quartile 3   | Quartile 4 | <i>P</i> for Trend <sup>a</sup> |
|--------------------------------------|------------|--------------|--------------|------------|---------------------------------|
| Range of ornithine (μmol/L)          | <17.2      | ≥17.2; <24.5 | ≥24.5; <38.8 | ≥38.8      | --                              |
| N                                    | 165        | 181          | 194          | 195        | --                              |
| Age (years)                          | 48.5 (8.8) | 49.5 (9.0)   | 49.2 (7.7)   | 48.4 (9.2) | 0.169                           |
| Body mass index (kg/m <sup>2</sup> ) | 24.4 (3.4) | 24.5 (3.2)   | 24.6 (3.2)   | 23.7 (3.3) | 0.007                           |
| Age at menarche (years)              | 15.2 (1.6) | 15.1 (1.6)   | 15.4 (1.7)   | 15.1 (1.7) | 0.370                           |
| Hypertension diagnosis (n, %)        | 21 (12.7)  | 27 (14.9)    | 24 (12.4)    | 27 (13.9)  | 0.496                           |
| Type II diabetes diagnosis (n, %)    | 4 (2.4)    | 12 (6.6)     | 4 (2.1)      | 6 (3.1)    | 0.736                           |
| History of cancer (n, %)             | 4 (2.4)    | 3 (1.7)      | 4 (3.1)      | 3 (4.1)    | 0.616                           |
| Smoking (n, %)                       | 1 (0.6)    | 3 (0.4)      | 6 (0.8)      | 8 (1.1)    | 0.076                           |
| Family history of cancer (n, %)      | 8 (4.9)    | 11 (6.1)     | 19 (9.8)     | 11 (5.6)   | 0.876                           |
| Postmenopausal status (n, %)         | 46 (27.9)  | 61 (33.7)    | 75 (38.7)    | 65 (33.3)  | 0.157                           |
| Parity (n, %)                        |            |              |              |            |                                 |
| 0                                    | 1 (0.6)    | 6 (3.3)      | 8 (4.1)      | 3 (1.5)    | 0.751                           |
| 1                                    | 118 (71.5) | 121 (66.5)   | 125 (64.4)   | 132 (67.7) | Referent                        |
| 2                                    | 44 (26.7)  | 47 (26.0)    | 57 (29.4)    | 55 (28.2)  | 0.491                           |
| 3+                                   | 2 (1.2)    | 7 (3.9)      | 4 (2.1)      | 5 (2.6)    | 0.584                           |

Unless otherwise specified, variables are presented as the mean (standard deviation). <sup>a</sup>*P* for trend was tested based on quartiles using medians of ornithine as continuous variables, and its model covariates included age, body mass index, age at menarche, hypertension diagnosis, type II diabetes diagnosis, history of cancer, smoking, alcohol consumption, family history of cancer, postmenopausal status, and parity.
